# Supplementary material for: Preparation of N-, O-, and S-Tri-Doped Biochar through One-Pot Pyrolysis of Poplar and Urea Formaldehyde and Its Enhanced Removal of Tetracycline from Wastewater
Source: MDPI journal article supplement (doi:10.3390/en15218081), 2022-10-31
Supplement: s1 [file s1]

---

**Supplementary data**

# Preparation of N, O and S-tridoped biochar by one-pot pyrolysis of poplar and urea formaldehyde and its enhanced tetracycline removal from wastewater

Wenran Gao <sup>a</sup>, Zixiang Lin <sup>a</sup>, Shanshan Yan <sup>a</sup>, Yaxuan Gao <sup>a</sup>, Hong Zhang <sup>a</sup>, Xun Hu <sup>c</sup>, Hongqi Sun <sup>d</sup> and Shu Zhang <sup>a,d,\*</sup>

<sup>a</sup> Joint International Research Laboratory of Biomass Energy and Materials, Co-Innovation Center of Efficient Processing and Utilization of Forest Resources, College of Materials Science and Engineering, Nanjing Forestry University, Nanjing 210037, China

<sup>c</sup> School of Material Science and Engineering, University of Jinan, Jinan 250022, Shandong, China

<sup>d</sup> School of Engineering, Edith Cowan University, 270 Joondalup Drive, Joondalup, Western Australia 6027, Australia

\* Correspondence: Authors. *E-mail*: s.zhang@njfu.edu.cn; *Tel.*: +86-025-85428330 (S. Zhang)

A manuscript for submission to *Energies* for consideration of publication

**Table S1.** Elemental analysis of S-containing urea formaldehyde.

| Elemental analysis (wt %, ar <sup>a</sup> ) |      |                |       |      |
|---------------------------------------------|------|----------------|-------|------|
| C                                           | H    | O <sup>b</sup> | N     | S    |
| 25.05                                       | 6.17 | 41.89          | 21.93 | 4.96 |

<sup>a</sup> as received basis; <sup>b</sup> by difference.

**Table S2.** Summary of maximum adsorption capacities ( $Q_{\max}$ ) of various adsorbents in literature for TC.

| Adsorbent                   | $Q_{\max}$ of TC (mg/g) | Refs       |
|-----------------------------|-------------------------|------------|
| Vine wood                   | 1.98                    | [1]        |
| Peanut hulls                | 28.0                    | [2]        |
| Salix                       | 25.4                    | [3]        |
| Auricularia auricula dregs  | 11.9                    | [4]        |
| Pinus taeda                 | 274.8                   | [5]        |
| Rice straw                  | 13.85                   | [6]        |
| Waste Fiberboard            | 13.72                   | [7]        |
| Popla and urea formaldehyde | 28.74                   | This study |

**Table S3.** Relationship between selected properties of biochar and adsorption capacity.

| Properties | Surface area | Elemental content |         |         | Surface elemental content |           |           | N-containing functional groups |       |        |       |
|------------|--------------|-------------------|---------|---------|---------------------------|-----------|-----------|--------------------------------|-------|--------|-------|
|            |              | O                 | S       | N       | Surface O                 | Surface S | Surface N | N-G                            | N-6   | N-5    | N-O   |
|            |              | content           | content | content | O                         | S         | N         |                                |       |        |       |
| $R^2$      | 0.478        | 0.741             | 0.635   | 0.847   | 0.636                     | 0.882     | 0.385     | 0.985                          | 0.262 | -0.444 | 0.882 |

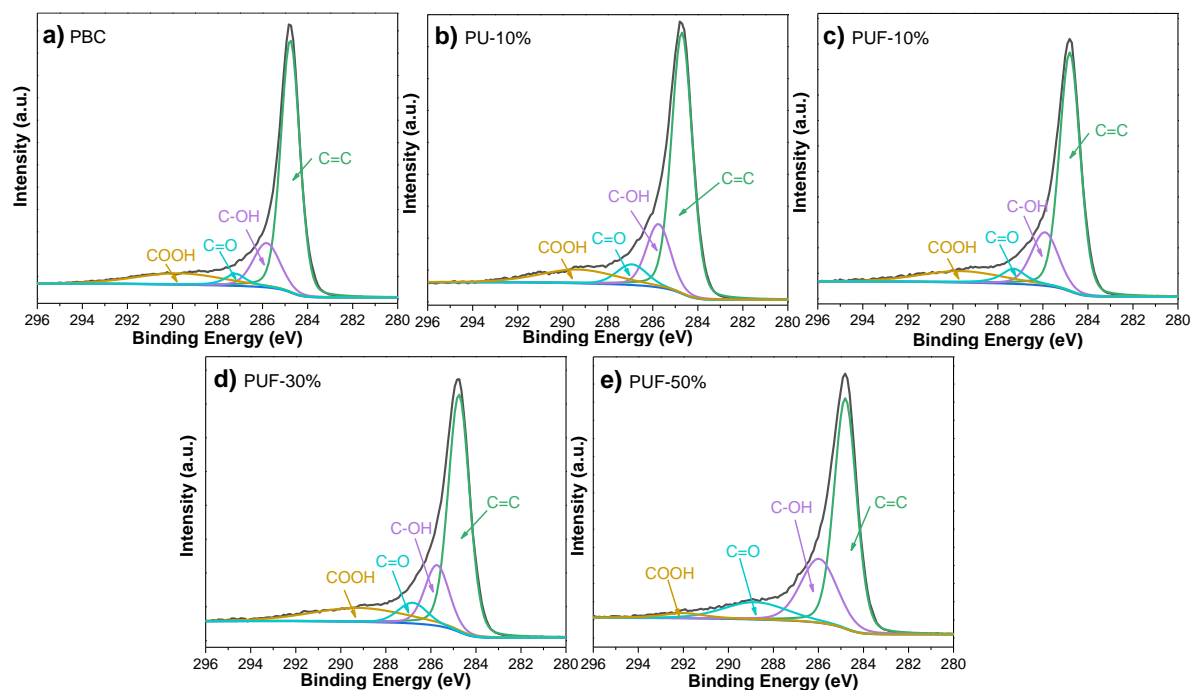

**Figure S1.** The C1s spectra of a) PBC, b) PU-10%, c) PUF-10%, d) PUF-30%, and e) PUF-50%. PBC stands for biochar prepared by poplar; PU1 stands for biochar prepared by poplar and urea with the mass ratio of urea being 10%; PUF-X stands for biochar prepared by poplar and urea formaldehyde with the mass ratio of urea formaldehyde being 10%, 30% and 50%.

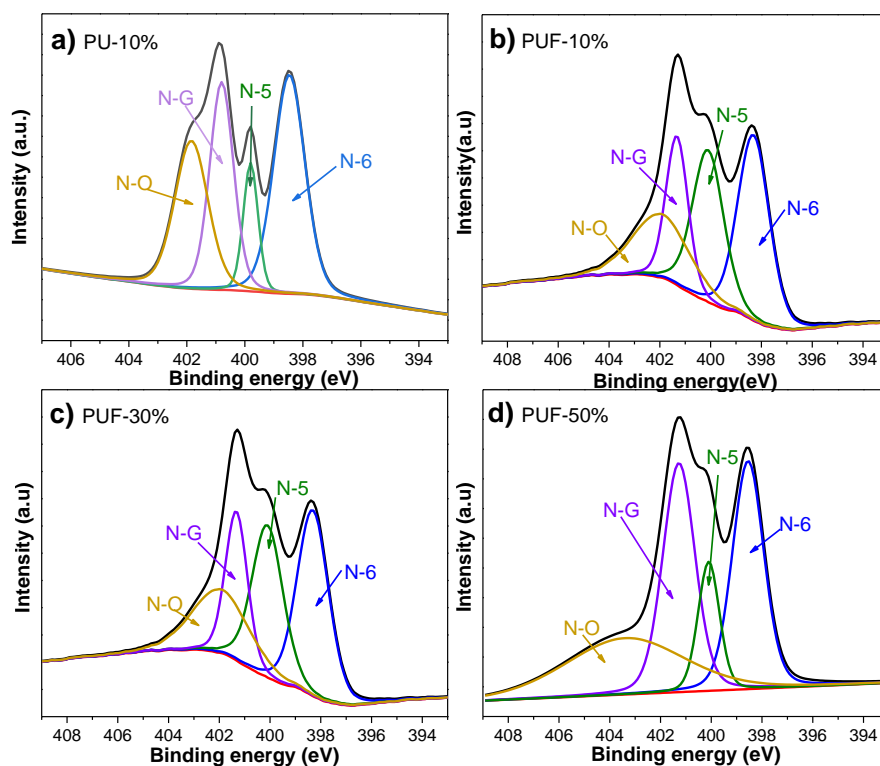

**Figure S2.** The N1s spectra of a) PU-10%, b) PUF-10%, c) PUF-30%, and d) PUF-50%.

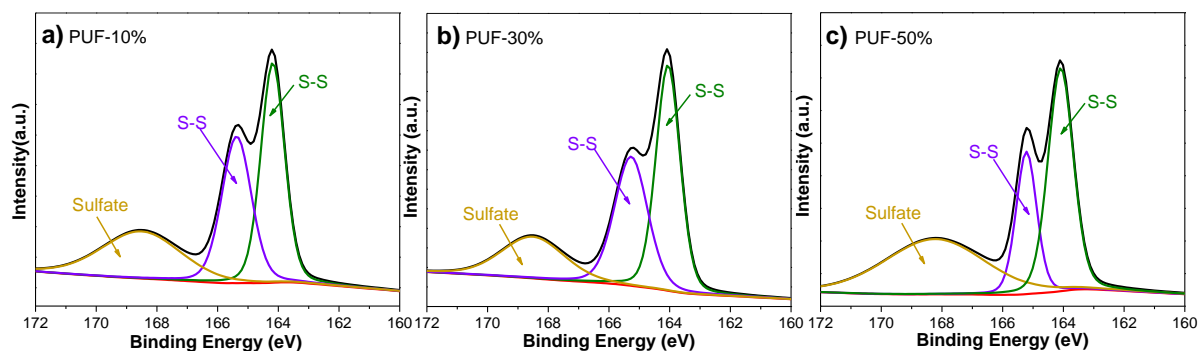

Figure S3. The S2p spectra of a) PUF-10%, b) PUF-30%, and c) PUF-50%.

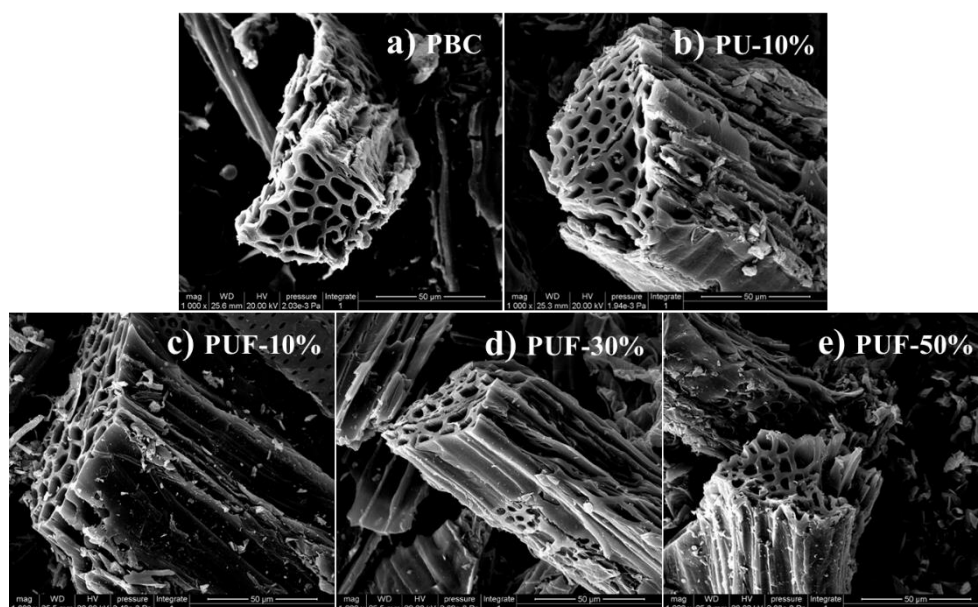

Figure S4. SEM images of a) PBC, b) PU-10%, c) PUF-10%, d) PUF-30%, and e) PUF-50%.

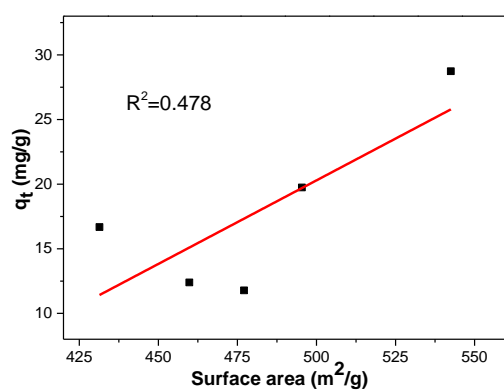

**Figure S5.** The correlations between surface area of biochar and adsorption capacity.

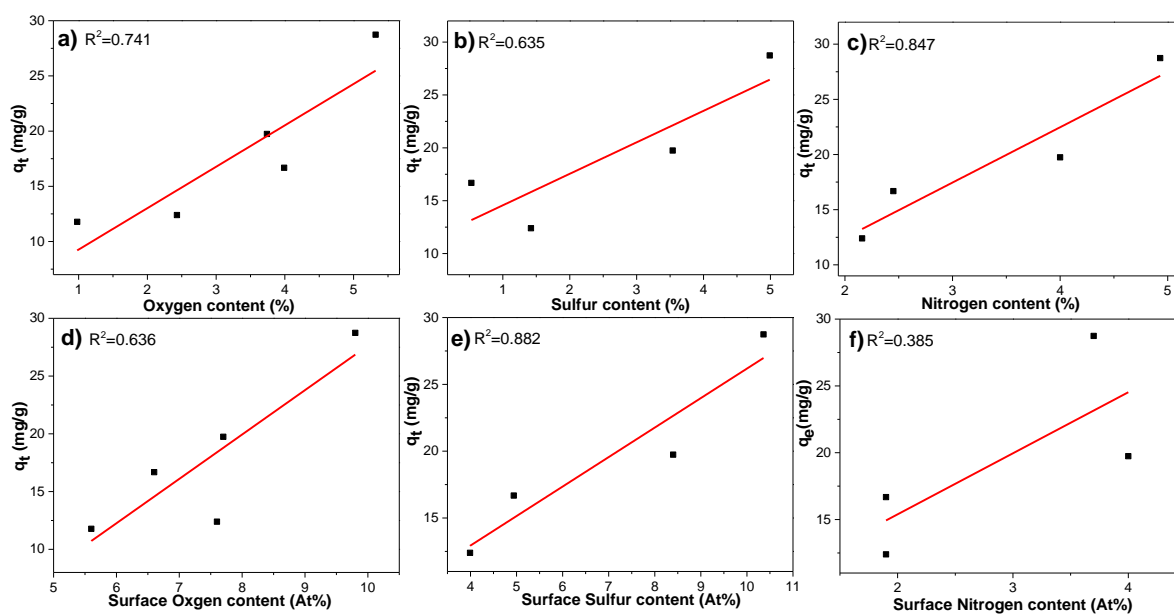

**Figure S6.** The correlations between a) oxygen content, b) sulfur content, c) nitrogen content, d) surface oxygen content, e) surface sulfur content, and f) surface nitrogen content of biochar and adsorption capacity.

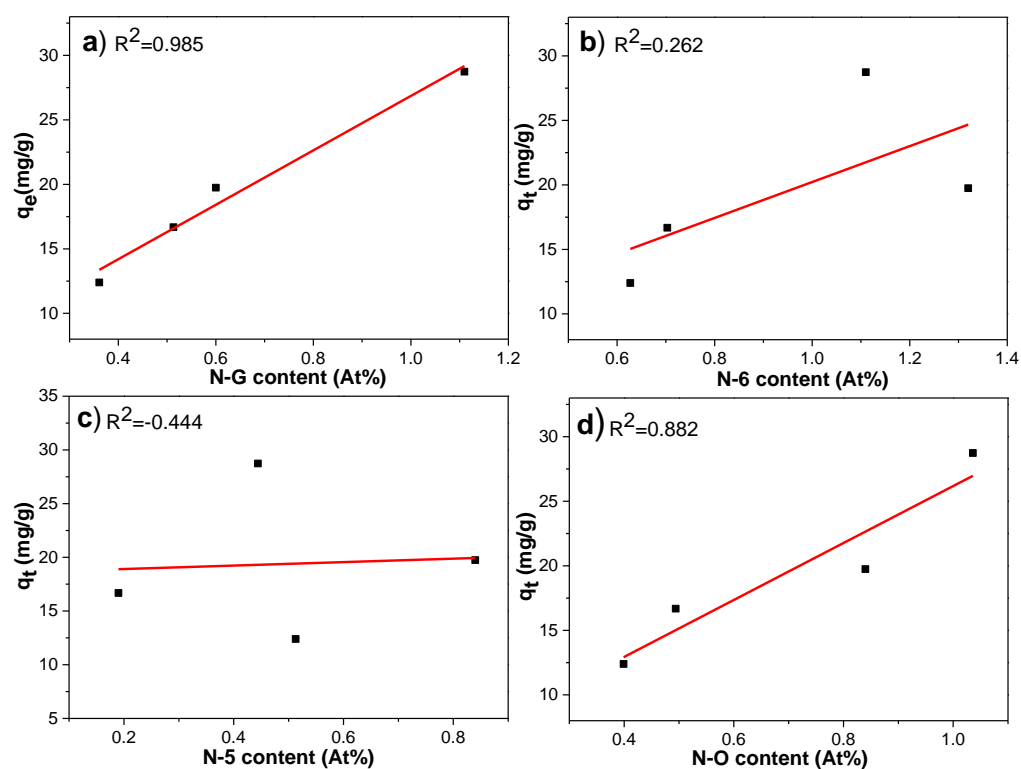

**Figure S7.** The correlations between a) N-G content, b) N-6 content, c) N-5 content, and d) N-O content of biochar and adsorption capacity.

---

**References:**

- [1] H.R. Pouretedal and N. Sadegh, Effective removal of Amoxicillin, Cephalexin, Tetracycline and Penicillin G from aqueous solutions using activated carbon nanoparticles prepared from vine wood, *Journal of Water Process Engineering*. 1 (2014), 64-73.
- [2] J. Torres-Pérez, C. Gérente and Y. Andrès, Sustainable Activated Carbons from Agricultural Residues Dedicated to Antibiotic Removal by Adsorption, *Chin. J. Chem. Eng.* 20 (2012), 524-529.
- [3] X. Zhu, Y. Liu, F. Qian, et al., Preparation of magnetic porous carbon from waste hydrochar by simultaneous activation and magnetization for tetracycline removal, *Bioresour. Technol.* 154 (2014), 209-214.
- [4] Y. Dai, J. Li and D. Shan, Adsorption of tetracycline in aqueous solution by biochar derived from waste *Auricularia auricula* dregs, *Chemosphere*. 238 (2020), 124432.
- [5] H.M. Jang, S. Yoo, Y.K. Choi, et al., Adsorption isotherm, kinetic modeling and mechanism of tetracycline on *Pinus taeda*-derived activated biochar, *Bioresour. Technol.* 259 (2018), 24-31.
- [6] H. Wang, Y. Chu, C. Fang, et al., Sorption of tetracycline on biochar derived from rice straw under different temperatures, *PLoS ONE*. 12 (2017), e0182776.
- [7] D. Xu, Y. Gao, Z. Lin, et al., Application of Biochar Derived From Pyrolysis of Waste Fiberboard on Tetracycline Adsorption in Aqueous Solution, *Front Chem.* 7 (2019), 943.
